# Supplementary material for: The complete chloroplast genome sequences of three Adenophora species and comparative analysis with Campanuloid species (Campanulaceae)
Source: PLoS One. 2017 Aug 22;12(8):e0183652. doi: 10.1371/journal.pone.0183652 (PMC5568750; doi:10.1371/journal.pone.0183652)
Supplement: S2 Table — (XLSX) [file pone.0183652.s004.xlsx]

## Sheet: Sheet1
Eta, Pi value, and PICs of 141 homologous loci
Region	Total number of mutation (Eta)	Divergence variation (Pi)	Parsimony informative characters (PICs)	Length (bp)	aligned lenght (bp)
Coding gene
psbA	1	0.00063	1	1062	1062
matK	25	0.00882	8	1530	1530
rps16	2	0.00389	1	300	300
atpA	5	0.00188	2	1506	1506
atpF	3	0.0027	0	555	555
atpH	1	0.00271	1	246	246
rpl2	12	0.00853	5	801	801
rps19	2	0.00414	1	282	282
rpl22	6	0.00556	0	540	540
rps3	16	0.01431	12	699	699
rpl16	4	0.00544	2	429	429
rpl14	5	0.00678	0	369	369
rps8	2	0.00254	0	393	393
rps11	9	0.01358	6	405	405
rpoA	29	0.01726	19	1014	1014
petD	1	0.00137	1	486	486
petB	0	0	0	651	651
psbH	1	0.00225	0	222	222
psbB	7	0.00273	4	1527	1527
rpl20	3	0.00551	2	333-339	339
rps18	4	0.00645	1	336-357	357
psbE	3	0.00661	1	252	252
ndhC	2	0.00275	0	363	363
ndhK	3	0.00228	0	657	657
ndhJ	3	0.00343	3	477	477
psbD	5	0.00251	1	1062	1062
psbC	5	0.00176	0	1422	1422
rps14	5	0.00964	2	294	294
psaB	12	0.00317	6	2205	2205
psaA	6	0.00163	4	2253	2253
rbcL	4	0.00152	1	1428	1428
atpB	13	0.00501	6	1497	1497
atpE	11	0.01493	3	402	402
ycf4	4	0.0042	2	555	555
cemA	3	0.00242	1	690	690
petA	5	0.00312	3	963	963
rps4	17	0.01478	4	609-615	615
ycf3	3	0.00362	2	507	507
rpoB	112	0.01961	47	3204-3219	3219
rpoC1	91	0.02498	40	2061-2070	2073
rpoC2	111	0.01571	58	4176-4269	4311
rps2	11	0.00934	8	732-765	765
atpI	2	0.00134	0	744	744
rps12(3')	3	0.00711	2	258	258
rps7	3	0.00321	0	468	468
ndhB	4	0.005	4	1533	1533
ycf2	173	0.01532	109	6951-7116	7268
rrn16	13	0.00425	8	1844	1844
rrn23	42	0.00765	20	3143-3216	3225
clpP	18	0.01658	3	573	573
ycf1	340	0.03011	121	6465-6822	7081
rps15	6	0.01111	4	330	330
ndhH	3	0.00141	1	1182	1182
ndhA	3	0.00168	2	1092	1092
ndhI	2	0.00198	0	504	504
ndhG	2	0.00251	2	531	531
ndhE	2	0.00385	1	303	303
ndhF	32	0.00878	21	2220	2220
rpl32	9	0.02415	3	207	207
ccsA	9	0.00516	2	936	936
ndhD	24	0.00854	7	1542	1542
psaC	2	0.00407	0	246	246
Non-coding regions
trnH(GUG)-psbA	13	0.02349	3	304-308	316
psbA-trnK(UUU)	4	0.0101	2	231	231
trnK(UUU) intron	46	0.0101	17	2528-2534	2534
trnK(UUU)-rps16	15	0.01559	10	588-597	597
rps16-trnQ(UUG)	56	0.0202	16	1521-1573	1583
trnQ(UUG)-psbK	5	0.0063	3	476-682	687
psbK-psbI	9	0.0124	7	457-466	466
trnS(GCU)-trnG(UCC)	14	0.01022	7	808-826	828
trnG(UUC) intron	11	0.0088	5	701-703	703
atpF intron	14	0.01166	10	745-751	752
atpF-atpH	5	0.00761	4	417-422	422
atpH-Ψrpl23	34	0.01516	14	1229-1313	1334
rpl2 intron	9	0.008	5	667	667
rpl16 intron	15	0.00836	7	1038-1040	1040
rpoA-petD	140	0.06819	51	1175-1197	1238
petD intron	5	0.00439	3	684	684
petB intron	6	0.00443	3	791-794	795
psbH-psbN	6	0.01377	2	242	242
psbT-psbB	11	0.03145	7	213-229	230
psbB-rpl20	288	0.102	219	1916-3281	3459
rpl20-rps18	9	0.01339	2	361	361
rpl33-psaJ	8	0.01042	4	448-454	454
psaJ-trnP(UGG)	8	0.01078	2	402-406	406
petL-psbE	16	0.00876	2	932-933	933
ndhJ-trnF(GAA)	11	0.01096	5	578-582	582
trnF(GAA)-trnL(UAA)	3	0.00528	2	347	347
trnL(UAA) intron	2	0.00264	2	505	505
trnL(UAA)-trnT(UGU)	8	0.00621	4	752-760	760
ΨpsbJ-trnD(GUC)	75	0.03801	47	1184-1226	1235
trnE(UUC)-trnT(GGU)	22	0.01474	3	782-785	787
trnT(GGU)-psbD	18	0.00855	6	1181-1192	1192
trnS(UGA)-psbZ	5	0.00784	1	341-347	347
psbZ-trnG(GCC)	5	0.00888	2	320-321	321
psaA-trnI(CAU)	7	0.00877	4	476-478	479
trnV(UAC) intron	5	0.00458	1	582-583	583
trnV(UAC)-trnC(GCA)	13	0.01028	10	806-809	812
trnC(GCA)-petN	344	0.08722	69	2092-2684	2709
petN-psbM	9	0.00906	2	515-517	517
psbM-trnV(GAC)	33	0.01345	5	1280-1286	1291
trnV(GAC)-rbcL	19	0.01178	5	877-824	932
rbcL-atpB	12	0.00763	2	809-813	813
atpE-psaI	8	0.0092	2	472-475	478
psaI-ycf4	3	0.0049	1	342-356	358
ycf4-cemA	18	0.01085	9	969-973	974
petA-rps4	10	0.00629	3	875-881	886
rps4-trnS(GGA)	6	0.01107	2	301-306	306
trnS(GGA)-trnV(GAC)	15	0.01166	10	787-801	801
trnV(GAC)-ΨpsbJ	55	0.04408	29	733-896	905
ycf3 intron1	11	0.00777	4	795-798	799
ycf3 intron2	7	0.00556	3	720-721	721
ycf3-rpoB	144	0.10918	4	661-1792	1799
rpoC1 intron	6	0.00464	3	754-755	755
rpoC2-rps2	1	0.00223	0	224-226	226
rps2-rps12(3')	12	0.00702	2	884-888	892
rps12 intron	3	0.00305	1	546-555	555
rps7-ndhB	6	0.0107	1	296-297	297
ndhB intron	10	0.00843	4	672	672
ndhB-trnI(CAU)	186	0.0705	84	1523-2397	2492
trnI(CAU)-ycf2	10	0.02371	4	232-250	250
ycf2-trnL(CAA)	12	0.01386	7	509-513	514
trnL(CAA)-rrn16	4	0.00937	2	249	249
rrn16-trnI(GAU)	1	0.00166	0	301	301
trnI(GAU) intron	0	0	0	918-926	927
trnA(UGC) intron	7	0.00458	1	801-817	817
rrn4.5-rrn5	2	0.00545	1	214-218	218
rrn5-trnR(AGC)	3	0.00692	1	241-287	287
trnR(AGC)-trnN(GUU)	2	0.00431	0	232-236	236
clpP intron1	9	0.00612	1	763	763
clpP intron2	2	0.00184	1	634-636	636
ycf3-rps12(5')	5	0.00903	1	299-1965	2165
rps12(5')-ycf1	3	0.00212	1	785	785
rrn23-rps15	0	0	0	282	282
ndhA intron	3	0.00147	0	1023-1026	1030
ndhI-ndhG	7	0.01055	4	395	395
ndhG-ndhE	4	0.01028	2	227	227
ndhF-rpl32	583	0.17886	330	1900-4556	4638
rpl32-trnL(UAG)	16	0.01789	6	503-517	524
ccsA-ndhD	9	0.01748	3	286	291
psaC-ndhE	8	0.01728	4	273-275	278
